# Supplementary material for: Developing the Symptoms and Functional Impairment Rating Scale: A Multi-Dimensional ADHD Scale
Source: PubMed Central journal article supplement — Psychiatry Investig. 2018 Jan 16;15(1):13–23. doi: 10.4306/pi.2018.15.1.13 (PMC5795025; doi:10.4306/pi.2018.15.1.13), 2018-01-16
Supplement: pi-15-13-s001.pdf [file pi-15-13-s001.pdf]

**Supplementary Table 1.** Correlation between SFIRS and SNAP-IV

| Factor | SNAP-IV inattention |                 | SNAP-IV hyperactivity-impulsivity |                 |
|--------|---------------------|-----------------|-----------------------------------|-----------------|
|        | ADHD (N=162)        | Control (N=117) | ADHD (N=162)                      | Control (N=117) |
| H-I    | 0.359**             | 0.593**         | 0.725**                           | 0.556**         |
| S-C    | 0.216**             | 0.496**         | 0.592**                           | 0.493**         |
| INA    | 0.559**             | 0.712**         | 0.385**                           | 0.586**         |
| S-M    | 0.602**             | 0.678**         | 0.328**                           | 0.542**         |
| SP     | 0.503**             | 0.699**         | 0.105                             | 0.533**         |
| SI     | 0.326**             | 0.616**         | 0.433**                           | 0.571**         |
| TS     | 0.589**             | 0.773**         | 0.581**                           | 0.660**         |

\*\*significantly correlated at  $p < 0.01$ . H-I: hyperactivity-impulsivity, S-C: self-control, INA: inattention, S-M: self-management, SP: school performance, SI: social interaction, TS: total score
